# Supplementary material
Source: PubMed Central journal article supplement (PMC3595308)
Supplement: cbt-14-254-s01.pdf [file cbt-14-254-s01.pdf]

## **Supplemental Material to:**

**Dorothea E. Mahlendorf and Martin Sebastian Staeger**

**Characterization of Ewing sarcoma associated cancer/  
testis antigens**

**Cancer Biology & Therapy 2012; 14(3)**

**<http://dx.doi.org/10.4161/cbt.23298>**

**<http://www.landesbioscience.com/journals/cbt/article/23298/>**

Table S1 may be downloaded here: <http://www.landesbioscience.com/journals/cbt/2012CBT5973R-TS1.xls>

Table S2 may be downloaded here: <http://www.landesbioscience.com/journals/cbt/2012CBT5973R-TS2.xls>

Table S3 may be downloaded here: <http://www.landesbioscience.com/journals/cbt/2012CBT5973R-TS3.xls>
